# Supplementary material
Source: PubMed Central journal article supplement (PMC3148725)
Supplement: JCI43656sd.pdf [file JCI43656sd.pdf]

## Supplementary data

### Platinum-based drugs disrupt STAT6-mediated suppression of immune responses against cancer in humans and mice

W. Joost Lesterhuis<sup>1</sup>, Cornelis J.A. Punt<sup>1</sup>, Stanleyson V. Hato<sup>2</sup>, Dagmar Eleveld-Trancikova<sup>2</sup>, Bastiaan J.H. Jansen<sup>2</sup>, Stefan Nierkens<sup>2</sup>, Gerty Schreibelt<sup>2</sup>, Annemiek de Boer<sup>2</sup>, Carla M.L. Van Herpen<sup>1</sup>, Johannes H. Kaanders<sup>3</sup>, Johan H.J.M. van Krieken<sup>4</sup>, Gosse J. Adema<sup>2</sup>, Carl G. Figdor<sup>2\*</sup>, I. Jolanda M. de Vries<sup>2\*</sup>

Departments of <sup>1</sup>Medical Oncology, <sup>2</sup>Tumor Immunology, <sup>3</sup>Radiotherapy and <sup>4</sup>Pathology of the Radboud University Nijmegen Medical Centre, Nijmegen, the Netherlands.

### Supplementary figure 1

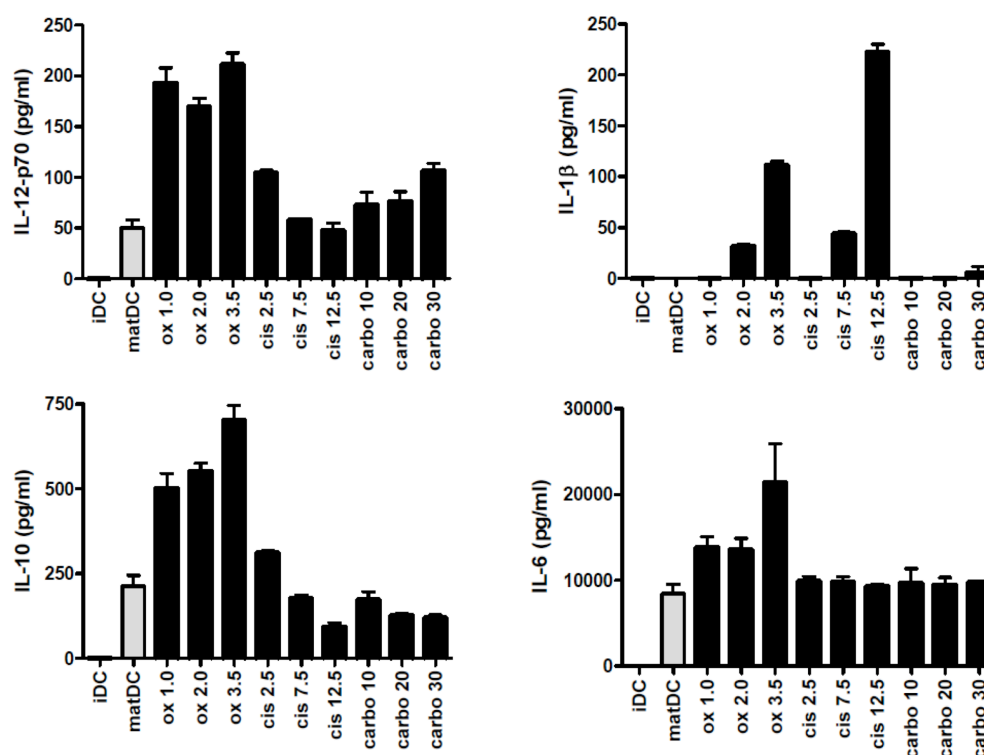

*Supplementary figure 1.* Cytokine production by monocyted-derived DCs, matured by R848/Poly-I:C in the presence of clinically relevant

concentrations of platinum compounds (numbers on X-axis denote  $\mu\text{g/ml}$ ). Levels are means with SD of 3 independent experiments.

### Supplementary figure 2

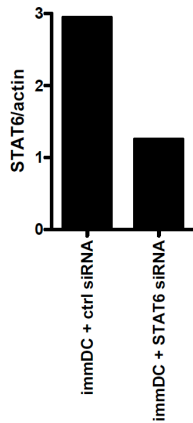

*Supplementary figure 2.* Knock-down efficiency of DCs transfected with control or STAT6-siRNA as measured by western blot analysis. The ratio of the integral intensity of STAT6 protein expression, normalized to the integral intensity of actin is shown.

### Supplementary figure 3

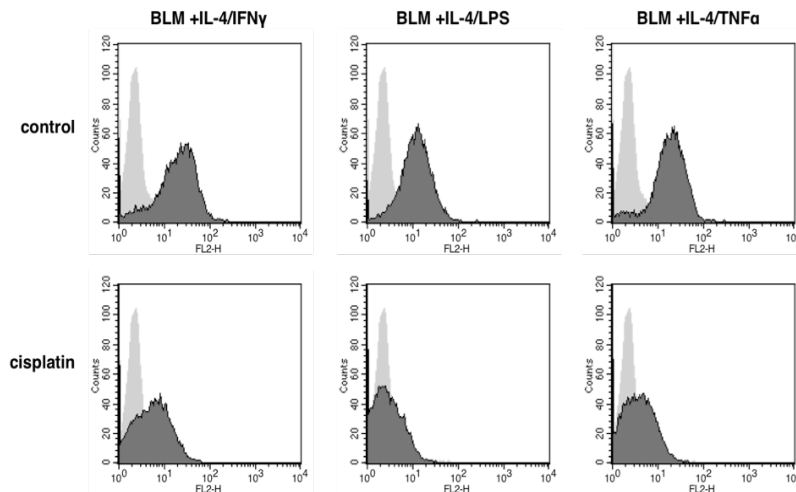

*Supplementary figure 3.* PD-L2 expression by BLM melanoma cell lines, treated with IL-4 combined with TNF- $\alpha$ /IFN- $\gamma$ /LPS, with or without cisplatin 10  $\mu\text{g/ml}$  (light-grey-isotype control, dark-grey PD-L2). A representative of 2 independent experiments is shown.

**Supplementary figure 4**

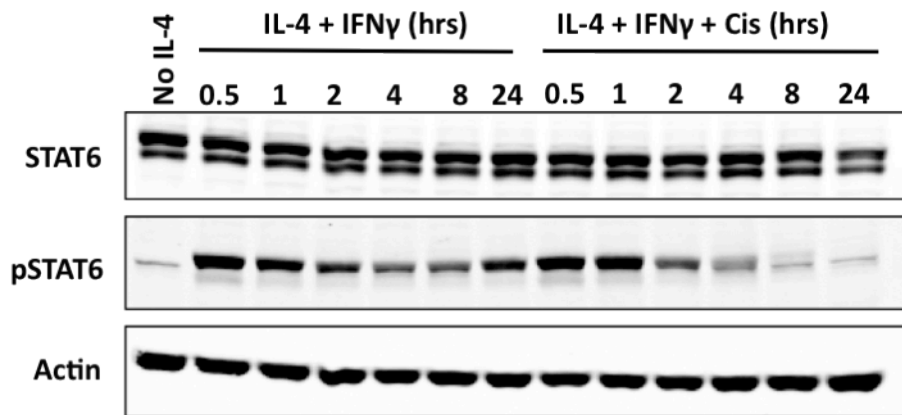

*Supplementary figure 4.* Western blot analysis of BLM melanoma cells. Expression of total STAT6, phosphorylated STAT6 and actin was measured 30 minutes, 1 hour, 2 hours, 4 hours, 8 hours and 24 hours after stimulation with IL-4/IFN- $\gamma$ , with or without cisplatin 20  $\mu$ g/ml. A representative of 2 independent experiments is shown.

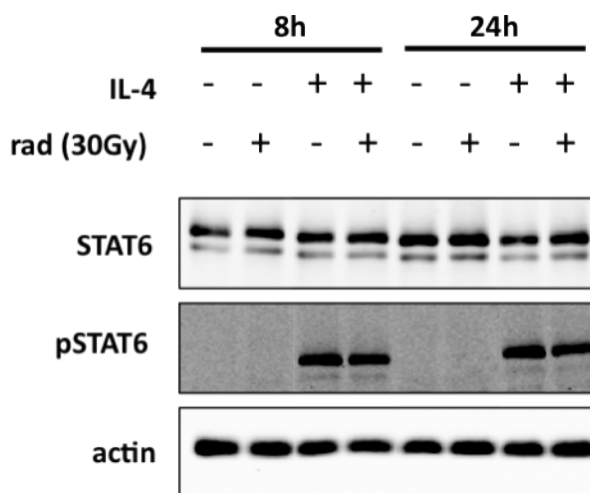

*Supplementary figure 5.* Western blot analysis of BLM melanoma cells treated with or without radiotherapy. Expression of total STAT6, phosphorylated STAT6 and actin was measured 8 hours and 24 hours after stimulation with IL-4 or radiotherapy, as indicated. A representative of 2 independent experiments is shown.

**Supplementary table 1. Characteristics of the chemotherapeutic agents used in the *in vitro* experiments.**

| compound                                                     | group                             | C <sub>max</sub> <sup>*</sup> | clinical dose                             | reference | used dose <i>in vitro</i> |
|--------------------------------------------------------------|-----------------------------------|-------------------------------|-------------------------------------------|-----------|---------------------------|
| Methotrexate (Emthexate®, Pharmachemie, the Netherlands)     | folic acid antagonist             | 363µg/ml                      | 8-12g/m <sup>2</sup>                      | (1)       | 350µg/ml                  |
| Vincristine (Vincristine, Pharmachemie, the Netherlands)     | vinca-alkaloid                    | 0.37µg/ml                     | 0.5mg/m <sup>2</sup>                      | (2)       | 0.4µg/ml                  |
| Irinotecan (Campto®, Pfizer, Belgium)                        | Topo-isomerase I inhibitor        | 5µg/ml                        | 350mg/m <sup>2</sup>                      | (3)       | 5µg/ml                    |
| Etoposide (Toposin®, Pharmachemie, the Netherlands)          | Topo-isomerase II inhibitor       | 15µg/ml                       | 150mg/m <sup>2</sup> (oral)               | (4)       | 15µg/ml                   |
| Bleomycin (Pharmachemie, the Netherlands)                    | anti-tumor antibiotic             | 0.19U/ml                      | 30U                                       | (5)       | 0.2U/ml                   |
| DTIC (Dacarbazin, Medac, Germany)                            | alkylating agent                  | 150µg/ml                      | 1900mg/m <sup>2</sup> (HD <sup>**</sup> ) | (6)       | 150µg/ml                  |
| Cisplatin (Platosin®, Pharmachemie, the Netherlands)         | platinum                          | 5 µg/ml                       | 100mg/m <sup>2</sup>                      | (7)       | 1; 2; 3; 5; 10 µg/ml      |
| Oxaliplatin (Eloxatin®, Sanofi-Synhelabo, the Netherlands)   | platinum                          | 2.5-5.5µg/ml                  | 130mg/m <sup>2</sup>                      | (8)       | 0.5; 2; 3; 4; 5; 7µg/ml   |
| Carboplatin (Carbosin®, Pharmachemie, the Netherlands)       | platinum                          | 40-80µg/ml                    | 500mg/m <sup>2</sup>                      | (9)       | 20; 40; 80; 120µg/ml      |
| Cyclophosphamide (Endoxan®, Baxter, the Netherlands)         | nitrogen mustard alkylating agent | 140µg/ml                      | 4g/m <sup>2</sup> (HD)                    | (10)      | 140µg/ml                  |
| Gemcitabine (Gemzar®, Eli Lilly, the Netherlands)            | pyrimidine antagonist             | 23µg/ml                       | 1000mg/m <sup>2</sup>                     | (11)      | 25µg/ml                   |
| 5-FU (5-Fluorouracil, Teva, the Netherlands)                 | pyrimidine antagonist             | 500µg/ml                      | 1250mg/m <sup>2</sup> (capecitabine)      | (12)      | 500µg/ml                  |
| Doxorubicine (Doxorubin®, Pharmachemie, the Netherlands)     | anthracycline deriviate           | 0.5µg/ml                      | 30mg/m <sup>2</sup>                       | (13)      | 0.5 µg/ml                 |
| Lenalidomide (Revlimid®, Cellgene-Europe, the Netherlands, ) | Thalidomide analogue              | 0.5µg/ml                      | 1x25mg                                    | (14)      | 0.5µg/ml                  |

\*C<sub>max</sub>: maximum concentration measured in blood of cancer patients after administration.

HD: high-dose regime

## Supplementary table 2. Patient characteristics

|                                   | STAT6+        | STAT6-        |
|-----------------------------------|---------------|---------------|
| <b>Cisplatin and Radiotherapy</b> | <b>(n=37)</b> | <b>(n=21)</b> |
| median age (range)                | 55 (32-71)    | 57 (40-74)    |
| <b>Localization</b>               |               |               |
| oral cavity/oropharynx            | 59%           | 47%           |
| hypopharynx                       | 41%           | 53%           |
| <b>T-stage</b>                    |               |               |
| T1                                | 3%            | 5%            |
| T2                                | 11%           | 14%           |
| T3                                | 43%           | 43%           |
| T4                                | 43%           | 38%           |
| <b>N-stage</b>                    |               |               |
| N0                                | 5%            | 14%           |
| N1                                | 11%           | 19%           |
| N2                                | 76%           | 62%           |
| N3                                | 8%            | 5%            |
| <b>Radiotherapy alone</b>         | <b>(n=24)</b> | <b>(n=24)</b> |
| Median age (range)                | 61 (46-78)    | 58 (41-76)    |
| <b>Localization</b>               |               |               |
| oral cavity/oropharynx            | 71%           | 75%           |
| hypopharynx                       | 29%           | 25%           |
| <b>T-stage</b>                    |               |               |
| T1                                | 0%            | 0%            |
| T2                                | 4%            | 8%            |
| T3                                | 54%           | 46%           |
| T4                                | 42%           | 46%           |
| <b>N-stage</b>                    |               |               |
| N0                                | 0%            | 4%            |
| N1                                | 21%           | 21%           |
| N2                                | 75%           | 67%           |
| N3                                | 4%            | 9%            |

1. Bacci, G., Loro, L., Longhi, A., Bertoni, F., Bacchini, P., Versari, M., Picci, P., and Serra, M. 2006. No correlation between methotrexate serum level and histologic response in the pre-operative treatment of extremity osteosarcoma. *Anticancer Drugs* 17:411-415.
2. Sethi, V.S., Jackson, D.V., Jr., White, D.R., Richards, F., 2nd, Stuart, J.J., Muss, H.B., Cooper, M.R., and Spurr, C.L. 1981. Pharmacokinetics of vincristine sulfate in adult cancer patients. *Cancer Res* 41:3551-3555.
3. Raymond, E., Fabbro, M., Boige, V., Rixe, O., Frenay, M., Vassal, G., Faivre, S., Sicard, E., Germa, C., Rodier, J.M., et al. 2003. Multicentre phase II study and pharmacokinetic analysis of irinotecan in chemotherapy-naive patients with glioblastoma. *Ann Oncol* 14:603-614.
4. Chabot, G.G., Armand, J.P., Terret, C., de Forni, M., Abigeres, D., Winograd, B., Igwemezie, L., Schacter, L., Kaul, S., Ropers, J., et al. 1996. Etoposide bioavailability after oral administration of the prodrug etoposide phosphate in cancer patients during a phase I study. *J Clin Oncol* 14:2020-2030.
5. Markasz, L., Stuber, G., Flaberg, E., Jernberg, A.G., Eksborg, S., Olah, E., Skribek, H., and Szekely, L. 2006. Cytotoxic drug sensitivity of Epstein-Barr virus transformed lymphoblastoid B-cells. *BMC Cancer* 6:265.

6. Buesa, J.M., and Urrechaga, E. 1991. Clinical pharmacokinetics of high-dose DTIC. *Cancer Chemother Pharmacol* 28:475-479.
7. Gullo, J.J., Litterst, C.L., Maguire, P.J., Sikic, B.I., Hoth, D.F., and Woolley, P.V. 1980. Pharmacokinetics and protein binding of cis-dichlorodiammine platinum (II) administered as a one hour or as a twenty hour infusion. *Cancer Chemother Pharmacol* 5:21-26.
8. Gamelin, E., Bouil, A.L., Boisdron-Celle, M., Turcant, A., Delva, R., Cailleux, A., Krikorian, A., Brienza, S., Cvitkovic, E., Robert, J., et al. 1997. Cumulative pharmacokinetic study of oxaliplatin, administered every three weeks, combined with 5-fluorouracil in colorectal cancer patients. *Clin Cancer Res* 3:891-899.
9. Gaver, R.C., Colombo, N., Green, M.D., George, A.M., Deeb, G., Morris, A.D., Canetta, R.M., Speyer, J.L., Farmen, R.H., and Muggia, F.M. 1988. The disposition of carboplatin in ovarian cancer patients. *Cancer Chemother Pharmacol* 22:263-270.
10. Chen, T.L., Kennedy, M.J., Anderson, L.W., Kiraly, S.B., Black, K.C., Colvin, O.M., and Grochow, L.B. 1997. Nonlinear pharmacokinetics of cyclophosphamide and 4-hydroxycyclophosphamide/aldophosphamide in patients with metastatic breast cancer receiving high-dose chemotherapy followed by autologous bone marrow transplantation. *Drug Metab Dispos* 25:544-551.
11. Sugiyama, E., Kaniwa, N., Kim, S.R., Kikura-Hanajiri, R., Hasegawa, R., Maekawa, K., Saito, Y., Ozawa, S., Sawada, J., Kamatani, N., et al. 2007. Pharmacokinetics of gemcitabine in Japanese cancer patients: the impact of a cytidine deaminase polymorphism. *J Clin Oncol* 25:32-42.
12. Gieschke, R., Reigner, B., Blesch, K.S., and Steimer, J.L. 2002. Population pharmacokinetic analysis of the major metabolites of capecitabine. *J Pharmacokinet Pharmacodyn* 29:25-47.
13. Eksborg, S., Strandler, H.S., Edsmyr, F., Naslund, I., and Tahvanainen, P. 1985. Pharmacokinetic study of i.v. infusions of adriamycin. *Eur J Clin Pharmacol* 28:205-212.
14. Chen, N., Lau, H., Kong, L., Kumar, G., Zeldis, J.B., Knight, R., and Laskin, O.L. 2007. Pharmacokinetics of lenalidomide in subjects with various degrees of renal impairment and in subjects on hemodialysis. *J Clin Pharmacol* 47:1466-1475.
